# Supplementary material for: Solvent-tuned magnetic exchange interactions in Dy2 systems ligated by a μ-phenolato heptadentate Schiff base
Source: Royal Society of Chemistry journal article supplement (doi:10.1039/c9ra08754k), 2019-01-01
Supplement: c9ra08754k1.pdf [file c9ra08754k1.pdf]

## Electronic Supplementary Information

### Solvent-tuned magnetic exchange interaction in Dy<sub>2</sub> system ligated by $\mu$ -phenolato heptadentate Schiff base

Zhijie Jiang,<sup>a</sup> Lin Sun,<sup>a,c</sup> Min Li,<sup>a</sup> Haipeng Wu,<sup>a</sup> Zhengqiang Xia,<sup>\*a</sup> Hongshan Ke,<sup>a</sup>  
Yiquan Zhang<sup>\*b</sup>, Gang Xie,<sup>a</sup> Sanping Chen<sup>\*a</sup>

---

<sup>a</sup> Key Laboratory of Synthetic and Natural Functional Molecule Chemistry of Ministry of Education, College of Chemistry and Materials Science, Northwest University, Xi'an, 710127, China.

<sup>b</sup> Jiangsu Key Laboratory for NSLSCS, School of Physical Science and Technology, Nanjing Normal University, Nanjing 210023, China

<sup>c</sup> College of Chemistry and Chemical Engineering, Henan University, Kaifeng 475001, China.

<sup>d</sup> School of Chemistry & Chemical Engineering, Shaanxi Xueqian Normal University, Xi'an 710100, China.

#### Corresponding Author

**Dr. Zhengqiang Xia, northwindy@126.com;**

**Prof. Sanping Chen, sanpingchen@126.com;**

**Prof. Yiquan Zhang, zhangyiquan@njnu.edu.cn**

## Table of Contents

|                                                                      |     |
|----------------------------------------------------------------------|-----|
| 1. X-ray crystallographic data.....                                  | S3  |
| 2. <sup>1</sup> H NMR and <sup>13</sup> C NMR spectra of Ligand..... | S5  |
| 3. X-Ray Powder Diffraction.....                                     | S7  |
| 4. Thermogravimetric analyses.....                                   | S8  |
| 5. Crystal Structure.....                                            | S8  |
| 6. Magnetic Measurements.....                                        | S10 |
| 7. Computational details.....                                        | S14 |
| 8. References.....                                                   | S18 |

## 1. X-ray crystallographic data

**Table S1.** Crystallographic Data for compounds **1-4**.

| Compound <sup>a</sup>                                      | 1                                                                             | 2                                                                                             | 3                                                                                             | 4                                                                                             |
|------------------------------------------------------------|-------------------------------------------------------------------------------|-----------------------------------------------------------------------------------------------|-----------------------------------------------------------------------------------------------|-----------------------------------------------------------------------------------------------|
| Empirical formula                                          | C <sub>54</sub> H <sub>54</sub> Dy <sub>2</sub> N <sub>8</sub> O <sub>6</sub> | C <sub>56</sub> H <sub>58</sub> Cl <sub>4</sub> Dy <sub>2</sub> N <sub>8</sub> O <sub>6</sub> | C <sub>62</sub> H <sub>64</sub> Cl <sub>6</sub> Dy <sub>2</sub> N <sub>8</sub> O <sub>8</sub> | C <sub>60</sub> H <sub>60</sub> Cl <sub>6</sub> Dy <sub>2</sub> N <sub>8</sub> O <sub>8</sub> |
| Formula weight                                             | 1236.05                                                                       | 1405.90                                                                                       | 1586.91                                                                                       | 1558.86                                                                                       |
| Crystal system                                             | Monoclinic                                                                    | Monoclinic                                                                                    | Triclinic                                                                                     | Monoclinic                                                                                    |
| Space group                                                | <i>P</i> 2 <sub>(1)</sub> / <i>n</i>                                          | <i>P</i> 2 <sub>(1)</sub> / <i>n</i>                                                          | <i>P</i> -1                                                                                   | <i>P</i> 2 <sub>(1)</sub> / <i>n</i>                                                          |
| <i>a</i> (Å)                                               | 11.211(3)                                                                     | 12.399(3)                                                                                     | 11.675(2)                                                                                     | 12.540(2)                                                                                     |
| <i>b</i> (Å)                                               | 18.586(5)                                                                     | 12.348(3)                                                                                     | 12.589(2)                                                                                     | 13.764(2)                                                                                     |
| <i>c</i> (Å)                                               | 11.571(3)                                                                     | 18.779(4)                                                                                     | 13.298(2)                                                                                     | 18.544(3)                                                                                     |
| <i>α</i> (°)                                               | 90.00                                                                         | 90.00                                                                                         | 64.222(3)                                                                                     | 90.00                                                                                         |
| <i>β</i> (°)                                               | 96.437(5)                                                                     | 98.274(4)                                                                                     | 84.541(3)                                                                                     | 98.178(3)                                                                                     |
| <i>γ</i> (°)                                               | 90.00                                                                         | 90.00                                                                                         | 65.307(3)                                                                                     | 90.00                                                                                         |
| <i>V</i> (Å <sup>3</sup> )                                 | 2395.8(11)                                                                    | 2845.3(11)                                                                                    | 1590.1(4)                                                                                     | 3168.1(9)                                                                                     |
| <i>Z</i>                                                   | 2                                                                             | 2                                                                                             | 1                                                                                             | 2                                                                                             |
| <i>F</i> (000)                                             | 1228                                                                          | 1396                                                                                          | 790                                                                                           | 1548                                                                                          |
| <i>R</i> 1 <sup>[a]</sup> , [ <i>I</i> > 2σ( <i>I</i> )]   | 0.0792                                                                        | 0.0539                                                                                        | 0.0502                                                                                        | 0.0517                                                                                        |
| w <i>R</i> 2 <sup>[b]</sup> , [ <i>I</i> > 2σ( <i>I</i> )] | 0.1834                                                                        | 0.1279                                                                                        | 0.1184                                                                                        | 0.0889                                                                                        |
| <i>R</i> 1 <sup>a</sup> , (all data)                       | 0.1139                                                                        | 0.1064                                                                                        | 0.0666                                                                                        | 0.1042                                                                                        |
| w <i>R</i> 2 <sup>b</sup> , (all data)                     | 0.2021                                                                        | 0.1622                                                                                        | 0.1411                                                                                        | 0.1056                                                                                        |
| GOF on <i>F</i> <sup>2</sup>                               | 1.107                                                                         | 1.004                                                                                         | 1.041                                                                                         | 0.980                                                                                         |

$${}^aR_1 = \Sigma(F_o - F_c)/\Sigma F_o, {}^b wR_2 = [\Sigma w(F_o^2 - F_c^2)^2/\Sigma w(F_o^2)^2]^{1/2}$$

**Table S2.** Selected bond lengths and angles for compounds **1-4**.

| 1                                          |          |                                            |          |                                            |          |
|--------------------------------------------|----------|--------------------------------------------|----------|--------------------------------------------|----------|
| Dy(1)-O(1)                                 | 2.226(7) | O(2) <sup>i</sup> -Dy(1)-N(1)              | 143.5(3) | O(2)-Dy(1)-N(1)                            | 113.2(3) |
| Dy(1)-O(2)                                 | 2.349(7) | O(1)-Dy(1)-N(4) <sup>i</sup>               | 75.6(3)  | N(4) <sup>i</sup> -Dy(1)-N(3) <sup>i</sup> | 66.0(3)  |
| Dy(1)-N(1)                                 | 2.485(9) | O(3) <sup>i</sup> -Dy(1)-N(4) <sup>i</sup> | 72.3(3)  | O(1)-Dy(1)-N(2)                            | 110.6(3) |
| Dy(1)-N(2)                                 | 2.784(8) | O(2) <sup>i</sup> -Dy(1)-N(4) <sup>i</sup> | 115.5(3) | O(3) <sup>i</sup> -Dy(1)-N(2)              | 81.3(3)  |
| Dy(1)-O(3) <sup>i</sup>                    | 2.239(8) | O(2)-Dy(1)-N(4) <sup>i</sup>               | 142.7(3) | O(2) <sup>i</sup> -Dy(1)-N(2)              | 83.0(2)  |
| Dy(1)-O(2) <sup>i</sup>                    | 2.332(7) | N(1)-Dy(1)-N(4) <sup>i</sup>               | 85.1(3)  | O(2)-Dy(1)-N(2)                            | 71.1(2)  |
| Dy(1)-N(4) <sup>i</sup>                    | 2.483(9) | O(1)-Dy(1)-N(3) <sup>i</sup>               | 80.9(3)  | N(1)-Dy(1)-N(2)                            | 65.2(3)  |
| Dy(1)-N(3) <sup>i</sup>                    | 2.771(8) | O(3) <sup>i</sup> -Dy(1)-N(3) <sup>i</sup> | 111.2(3) | N(4) <sup>i</sup> -Dy(1)-N(2)              | 144.3(3) |
| O(1)-Dy(1)-O(3) <sup>i</sup>               | 136.3(3) | O(2) <sup>i</sup> -Dy(1)-N(3) <sup>i</sup> | 71.0(2)  | N(3) <sup>i</sup> -Dy(1)-N(2)              | 148.5(2) |
| O(1)-Dy(1)-O(2) <sup>i</sup>               | 139.9(2) | O(2)-Dy(1)-N(3) <sup>i</sup>               | 82.9(2)  | O(1)-Dy(1)-N(1)                            | 72.0(3)  |
| O(3) <sup>i</sup> -Dy(1)-O(2) <sup>i</sup> | 81.7(3)  | N(1)-Dy(1)-N(3) <sup>i</sup>               | 144.5(3) | O(3) <sup>i</sup> -Dy(1)-N(1)              | 76.4(3)  |
| O(1)-Dy(1)-O(2)                            | 79.7(3)  | O(3) <sup>i</sup> -Dy(1)-O(2)              | 141.6(3) | O(2) <sup>i</sup> -Dy(1)-O(2)              | 69.2(3)  |
| <sup>i</sup> -x,-y,-z                      |          |                                            |          |                                            |          |
| 2                                          |          |                                            |          |                                            |          |

|                                            |            |                                            |            |                                            |            |
|--------------------------------------------|------------|--------------------------------------------|------------|--------------------------------------------|------------|
| Dy(1)-O(1)                                 | 2.307(6)   | O(3)-Dy(1)-O(1) <sup>i</sup>               | 139.1(2)   | O(3)-Dy(1)-N(2)                            | 80.1(2)    |
| Dy(1)-O(2)                                 | 2.233(7)   | O(1)-Dy(1)-O(1) <sup>i</sup>               | 69.4(3)    | O(1)-Dy(1)-N(2)                            | 83.0(2)    |
| Dy(1)-O(3)                                 | 2.224(7)   | O(3)-Dy(1)-N(1)                            | 77.6(3)    | O(1) <sup>i</sup> -Dy(1)-N(2)              | 71.1(2)    |
| Dy(1)-O(1) <sup>i</sup>                    | 2.322(6)   | O(2)-Dy(1)-N(1)                            | 72.2(3)    | N(1)-Dy(1)-N(2)                            | 66.5(3)    |
| Dy(1)-N(1)                                 | 2.479(8)   | O(1)-Dy(1)-N(1)                            | 144.2(3)   | N(4)-Dy(1)-N(2)                            | 143.3(3)   |
| Dy(1)-N(4)                                 | 2.501(9)   | O(1) <sup>i</sup> -Dy(1)-N(1)              | 114.4(2)   | O(3)-Dy(1)-N(3)                            | 111.0(2)   |
| Dy(1)-N(2)                                 | 2.754(8)   | O(3)-Dy(1)-N(4)                            | 72.3(3)    | O(2)-Dy(1)-N(3)                            | 80.5(2)    |
| Dy(1)-N(3)                                 | 2.773(8)   | O(2)-Dy(1)-N(4)                            | 77.6(3)    | O(1)-Dy(1)-N(3)                            | 70.7(2)    |
| O(3)-Dy(1)-O(2)                            | 139.0(2)   | O(1)-Dy(1)-N(4)                            | 113.8(2)   | O(1) <sup>i</sup> -Dy(1)-N(3)              | 82.8(2)    |
| O(3)-Dy(1)-O(1)                            | 79.0(2)    | O(1) <sup>i</sup> -Dy(1)-N(4)              | 144.4(3)   | N(1)-Dy(1)-N(3)                            | 143.7(3)   |
| O(2)-Dy(1)-O(1)                            | 139.8(2)   | N(1)-Dy(1)-N(4)                            | 84.1(3)    | N(4)-Dy(1)-N(3)                            | 66.7(3)    |
| O(2)-Dy(1)-O(1) <sup>i</sup>               | 79.8(2)    | O(2)-Dy(1)-N(2)                            | 111.2(2)   | N(2)-Dy(1)-N(3)                            | 148.1(2)   |
| <sup>i</sup> -x,-y+2,-z                    |            |                                            |            |                                            |            |
| <b>3</b>                                   |            |                                            |            |                                            |            |
| Dy(1)-O(1) <sup>i</sup>                    | 2.227(5)   | O(3)-Dy(1)-O(2) <sup>i</sup>               | 140.29(19) | O(3)-Dy(1)-N(2)                            | 110.2(2)   |
| Dy(1)-O(3)                                 | 2.226(6)   | O(2)-Dy(1)-O(2) <sup>i</sup>               | 69.5(2)    | O(2)-Dy(1)-N(2)                            | 71.25(18)  |
| Dy(1)-O(2)                                 | 2.311(5)   | O(1) <sup>i</sup> -Dy(1)-N(1)              | 75.4(2)    | O(2) <sup>i</sup> -Dy(1)-N(2)              | 83.43(19)  |
| Dy(1)-O(2) <sup>i</sup>                    | 2.347(6)   | O(3)-Dy(1)-N(1)                            | 72.2(2)    | N(1)-Dy(1)-N(2)                            | 66.8(2)    |
| Dy(1)-N(1)                                 | 2.466(7)   | O(2)-Dy(1)-N(1)                            | 115.8(2)   | N(4) <sup>i</sup> -Dy(1)-N(2)              | 144.0(2)   |
| Dy(1)-N(4) <sup>i</sup>                    | 2.488(7)   | O(2) <sup>i</sup> -Dy(1)-N(1)              | 144.0(2)   | O(1) <sup>i</sup> -Dy(1)-N(3) <sup>i</sup> | 112.0(2)   |
| Dy(1)-N(2)                                 | 2.729(7)   | O(1) <sup>i</sup> -Dy(1)-N(4) <sup>i</sup> | 71.5(2)    | O(3)-Dy(1)-N(3) <sup>i</sup>               | 80.7(2)    |
| Dy(1)-N(3) <sup>i</sup>                    | 2.763(7)   | O(3)-Dy(1)-N(4) <sup>i</sup>               | 78.4(2)    | O(2)-Dy(1)-N(3) <sup>i</sup>               | 82.36(19)  |
| O(1) <sup>i</sup> -Dy(1)-O(3)              | 137.4(2)   | O(2)-Dy(1)-N(4) <sup>i</sup>               | 143.8(2)   | O(2) <sup>i</sup> -Dy(1)-N(3) <sup>i</sup> | 71.09(19)  |
| O(1) <sup>i</sup> -Dy(1)-O(2)              | 140.3(2)   | O(2) <sup>i</sup> -Dy(1)-N(4) <sup>i</sup> | 112.8(2)   | N(1)-Dy(1)-N(3) <sup>i</sup>               | 143.1(2)   |
| O(3)-Dy(1)-O(2)                            | 79.7(2)    | N(1)-Dy(1)-N(4) <sup>i</sup>               | 84.1(2)    | N(4) <sup>i</sup> -Dy(1)-N(3) <sup>i</sup> | 65.9(2)    |
| O(1) <sup>i</sup> -Dy(1)-O(2) <sup>i</sup> | 80.32(19)  | O(1) <sup>i</sup> -Dy(1)-N(2)              | 80.5(2)    | N(2)-Dy(1)-N(3) <sup>i</sup>               | 148.5(2)   |
| <sup>i</sup> -x,-y+2,-z                    |            |                                            |            |                                            |            |
| <b>4</b>                                   |            |                                            |            |                                            |            |
| Dy(1)-O(3)                                 | 2.214(5)   | O(1)-Dy(1)-O(2) <sup>i</sup>               | 138.80(16) | O(1)-Dy(1)-N(1)                            | 111.50(18) |
| Dy(1)-O(1)                                 | 2.228(5)   | O(2)-Dy(1)-O(2) <sup>i</sup>               | 69.4(2)    | O(2)-Dy(1)-N(1)                            | 71.23(17)  |
| Dy(1)-O(2)                                 | 2.316(5)   | O(3)-Dy(1)-N(2)                            | 78.02(19)  | O(2) <sup>i</sup> -Dy(1)-N(1)              | 83.36(17)  |
| Dy(1)-O(2) <sup>i</sup>                    | 2.322(5)   | O(1)-Dy(1)-N(2)                            | 71.84(19)  | N(2)-Dy(1)-N(1)                            | 66.37(19)  |
| Dy(1)-N(2)                                 | 2.496(6)   | O(2)-Dy(1)-N(2)                            | 113.31(19) | N(3)-Dy(1)-N(1)                            | 142.60(19) |
| Dy(1)-N(3)                                 | 2.496(6)   | O(2) <sup>i</sup> -Dy(1)-N(2)              | 145.16(19) | O(3)-Dy(1)-N(4)                            | 112.11(19) |
| Dy(1)-N(1)                                 | 2.751(6)   | O(3)-Dy(1)-N(3)                            | 71.6(2)    | O(1)-Dy(1)-N(4)                            | 79.65(18)  |
| Dy(1)-N(4)                                 | 2.789(6)   | O(1)-Dy(1)-N(3)                            | 79.22(19)  | O(2)-Dy(1)-N(4)                            | 83.07(17)  |
| O(3)-Dy(1)-O(1)                            | 139.42(17) | O(2)-Dy(1)-N(3)                            | 145.35(19) | O(2) <sup>i</sup> -Dy(1)-N(4)              | 70.88(17)  |
| O(3)-Dy(1)-O(2)                            | 138.89(17) | O(2) <sup>i</sup> -Dy(1)-N(3)              | 112.71(18) | N(2)-Dy(1)-N(4)                            | 142.98(19) |
| O(1)-Dy(1)-O(2)                            | 79.23(17)  | N(2)-Dy(1)-N(3)                            | 85.0(2)    | N(3)-Dy(1)-N(4)                            | 66.56(19)  |
| O(3)-Dy(1)-O(2) <sup>i</sup>               | 79.71(17)  | O(3)-Dy(1)-N(1)                            | 79.06(19)  | N(1)-Dy(1)-N(4)                            | 148.75(17) |

$i-x+1,-y+2,-z+1$

**Table S3.** The calculated results for Dy<sup>III</sup> ions configuration of compounds **1-4** by SHAPE 2.1 software.

| Configuration                                           | ABOXIY, 1    | ABOXIY, 2    | ABOXIY, 3    | ABOXIY, 4    |
|---------------------------------------------------------|--------------|--------------|--------------|--------------|
| Hexagonal bipyramid ( $D_{6h}$ )                        | 16.243       | 15.848       | 16.139       | 15.883       |
| Cube ( $O_h$ )                                          | 11.002       | 10.334       | 10.570       | 9.962        |
| <b>Square antiprism (<math>D_{4d}</math>)</b>           | <b>1.423</b> | <b>1.318</b> | <b>1.268</b> | <b>1.389</b> |
| Triangulardodecahedron ( $D_{2d}$ )                     | 3.353        | 3.449        | 3.252        | 3.357        |
| Johnson gyrobifastigium J26 ( $D_{2d}$ )                | 17.223       | 17.710       | 17.043       | 17.539       |
| Johnson elongated triangular bipyramid J14 ( $D_{3h}$ ) | 25.811       | 25.929       | 25.832       | 25.479       |
| Biaugmented trigonal prism J50 ( $C_{2v}$ )             | 4.109        | 4.011        | 3.885        | 3.933        |
| Biaugmented trigonal prism ( $C_{2v}$ )                 | 3.402        | 3.338        | 3.101        | 3.486        |
| Snub sphenoid J84 ( $D_{2d}$ )                          | 6.584        | 6.499        | 6.202        | 6.408        |

## 2. The <sup>1</sup>H NMR and <sup>13</sup>C NMR spectra of Ligand

### 2.1 The <sup>1</sup>H NMR and <sup>13</sup>C{<sup>1</sup>H} spectra of ligand H<sub>3</sub>api

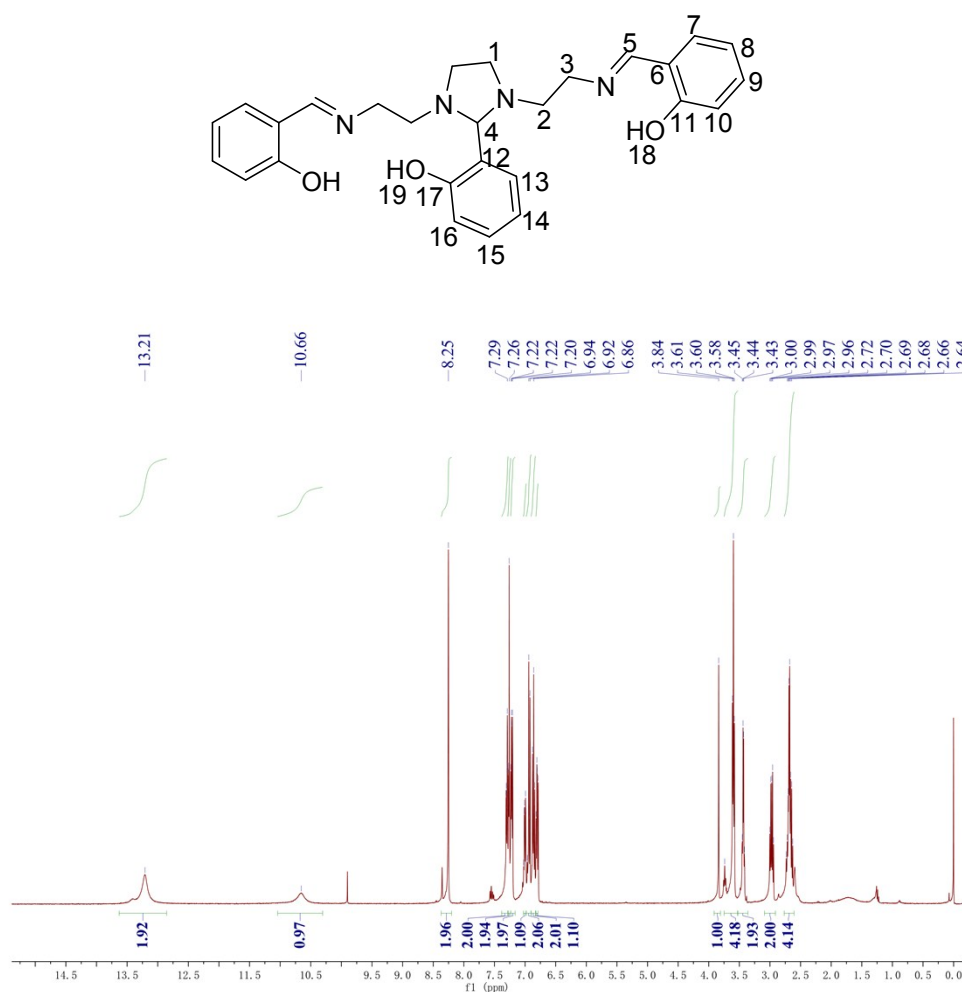

**Fig. S1**  $^1\text{H}$ -NMR spectra of ligand  $\text{H}_3\text{api}$ .

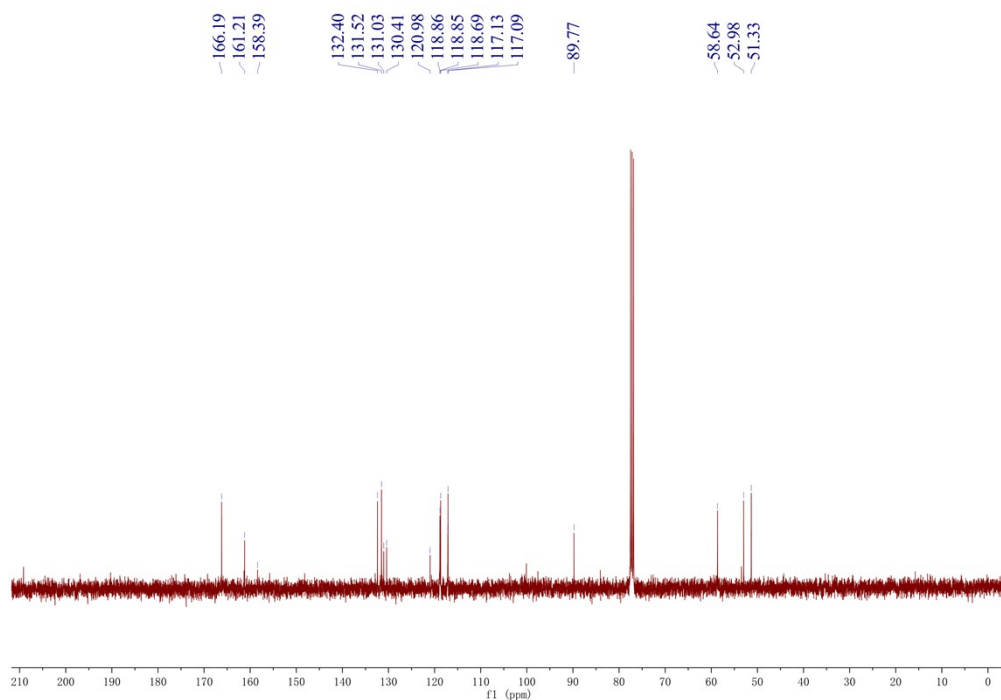

**Fig. S2**  $^{13}\text{C}\{^1\text{H}\}$  NMR spectra of ligand  $\text{H}_3\text{api}$ .

## 2.2 The $^1\text{H}$ NMR and $^{13}\text{C}\{^1\text{H}\}$ spectra of ligand $\text{H}_3\text{Clapi}$

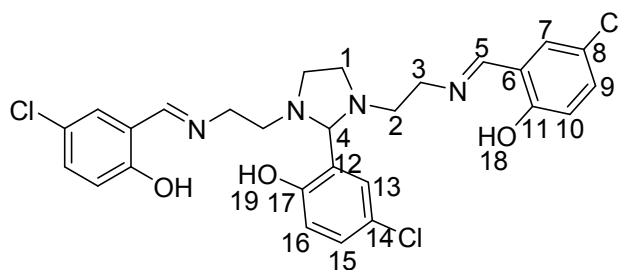

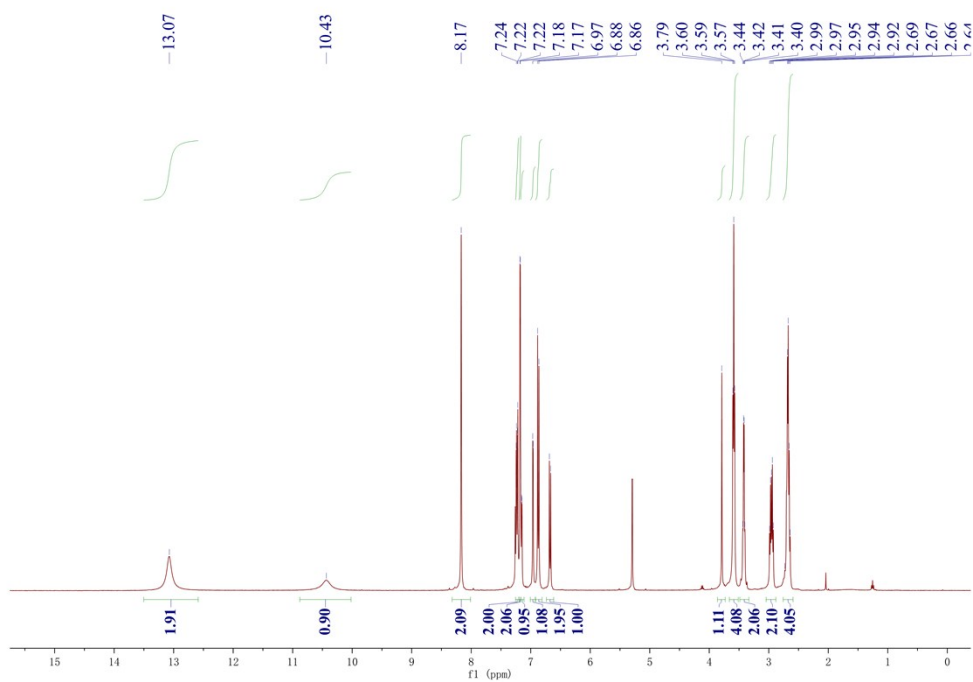

**Fig. S3**  $^1\text{H}$ -NMR spectra of ligand  $\text{H}_3\text{Clapi}$ .

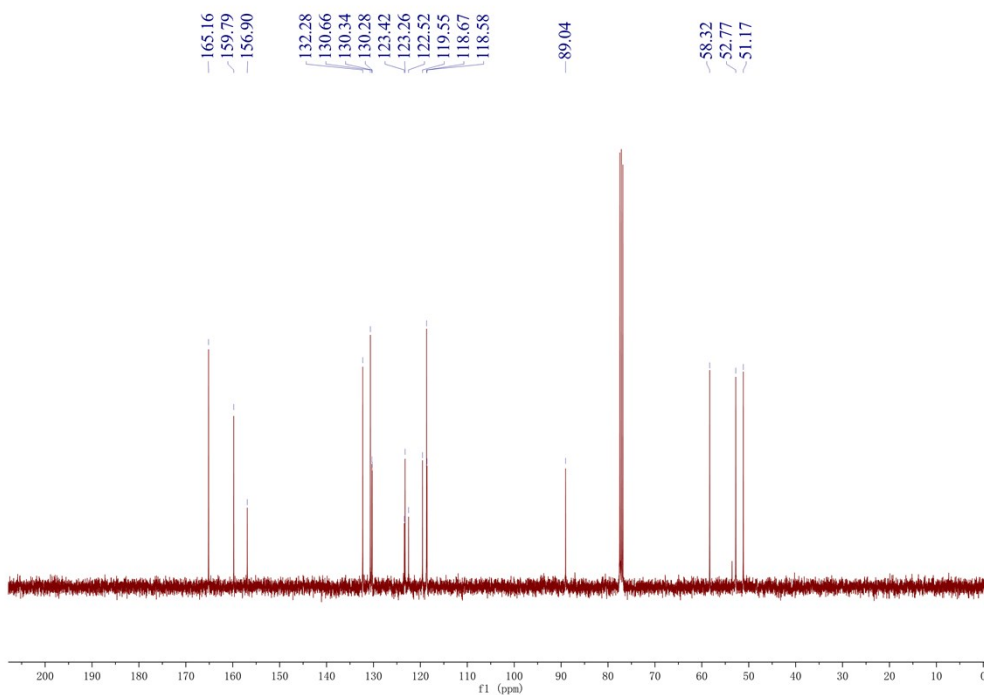

**Fig. S4**  $^{13}\text{C}\{^1\text{H}\}$  NMR spectra of ligand  $\text{H}_3\text{api}$ .

### 3. X-Ray Powder Diffraction

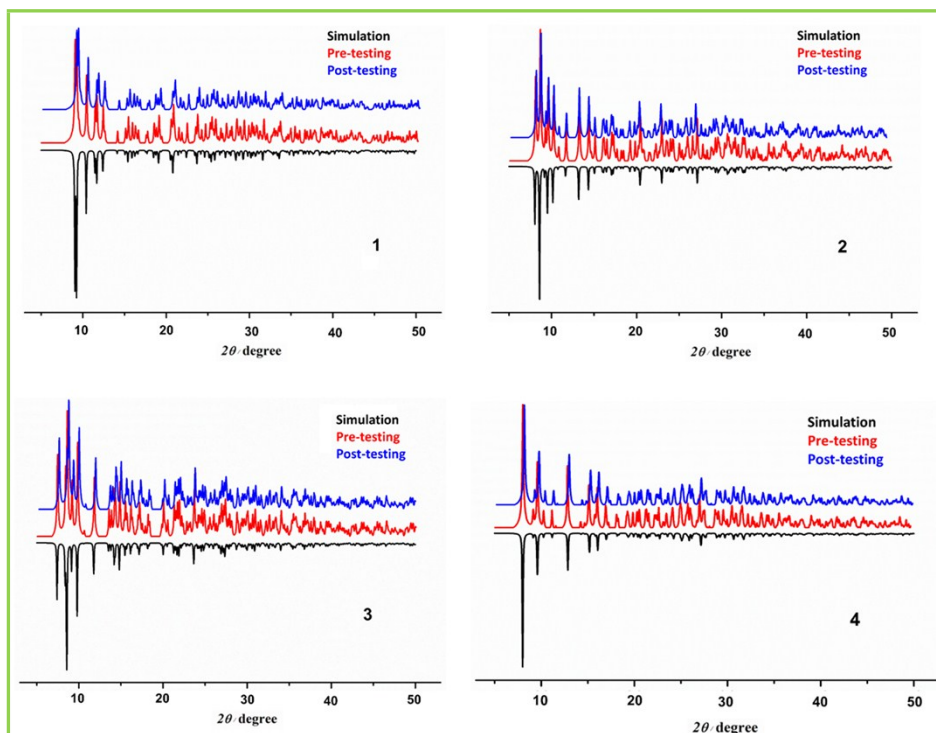

Fig. S5 Experimental and simulated PXRD of compounds 1-4.

#### 4. Thermogravimetric analyses

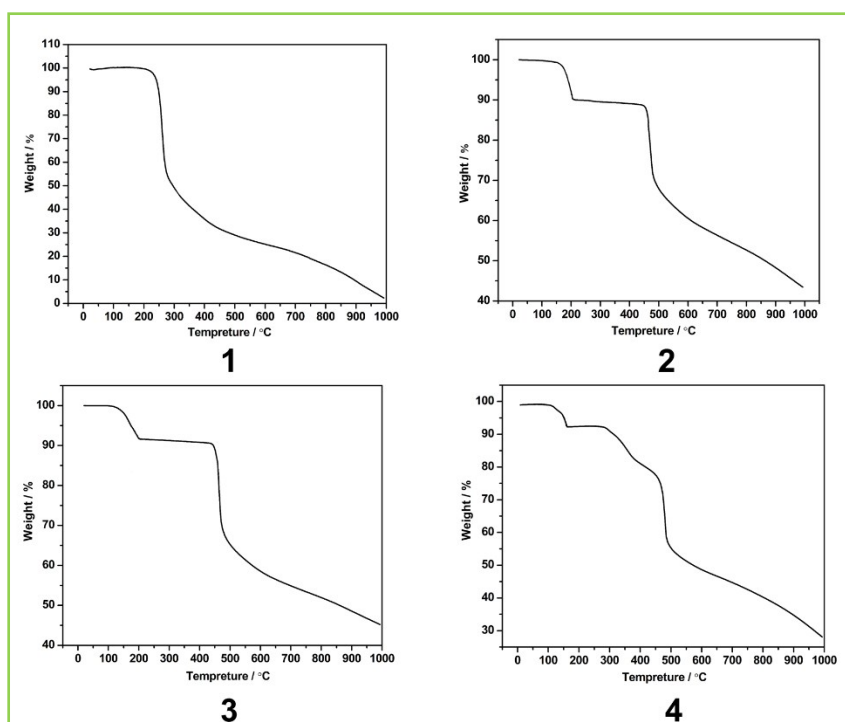

Fig. S6 Thermogravimetric analyses curve of compounds 1-4.

#### 5. Crystal Structure



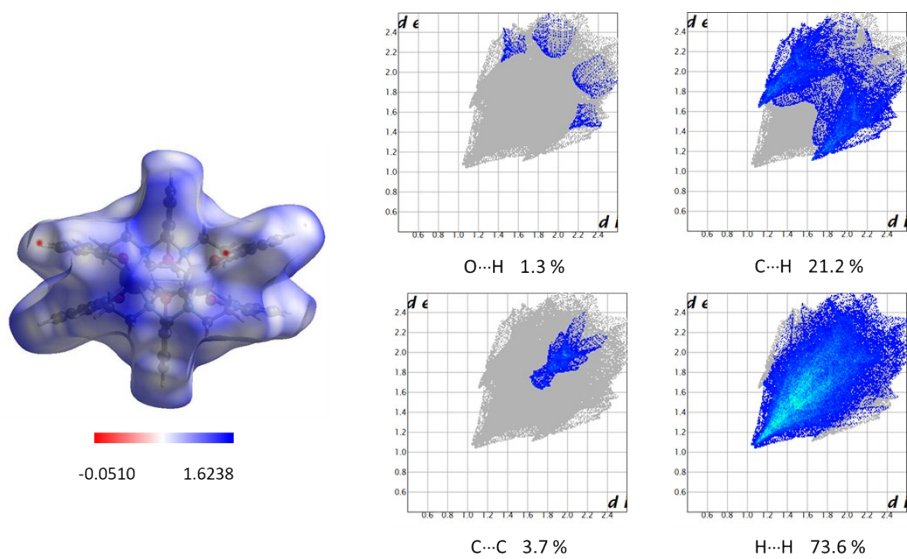

**Fig. S7** The 3D Hirshfeld surface analysis and 2D fingerprint plot of compound 1.

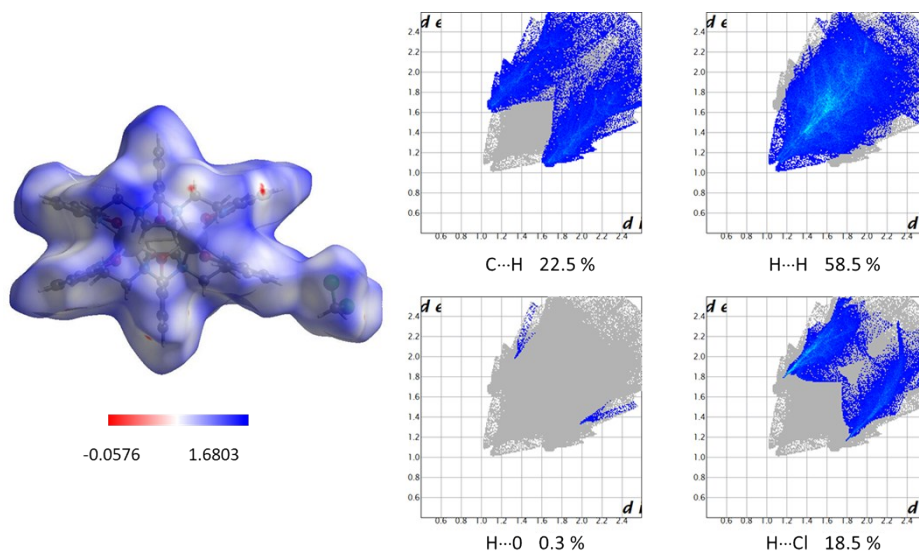

**Fig. S8** The 3D Hirshfeld surface analysis and 2D fingerprint plot of compound 2.

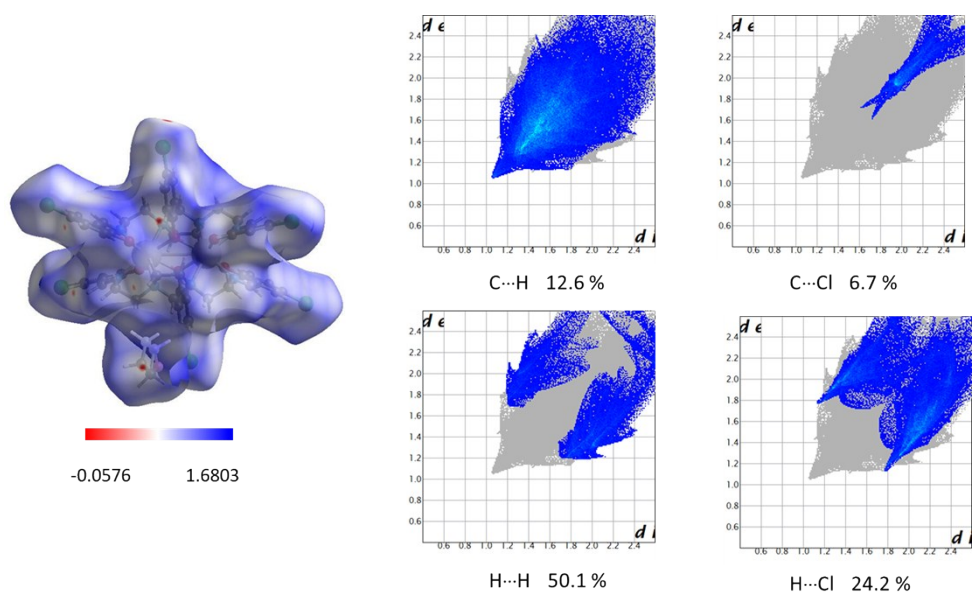

**Fig. S9** The 3D Hirshfeld surface analysis and 2D fingerprint plot of compound 3.

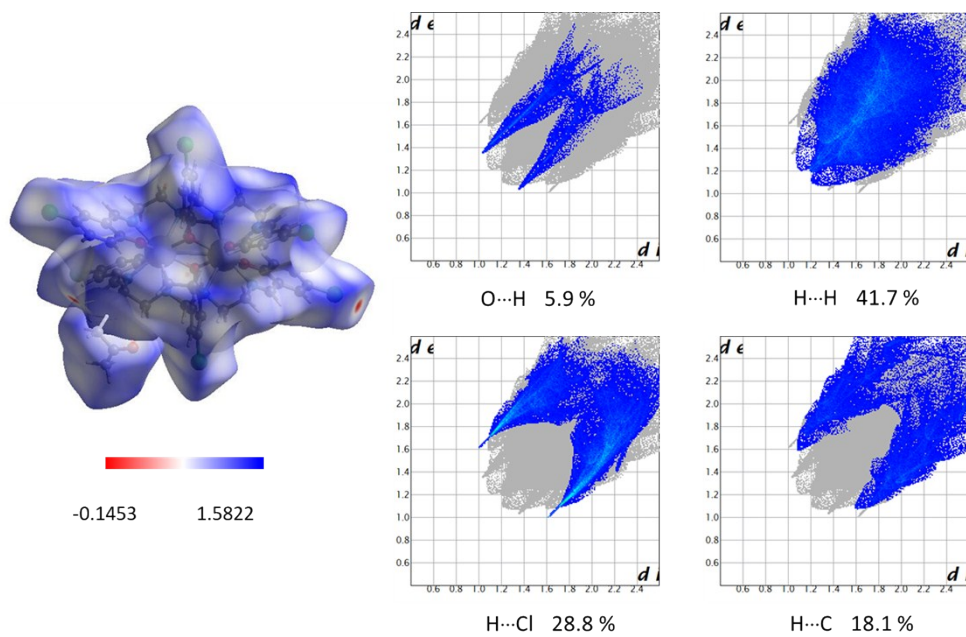

**Fig. S10** The 3D Hirshfeld surface analysis and 2D fingerprint plot of compound 4.

## 6. Magnetic Measurements

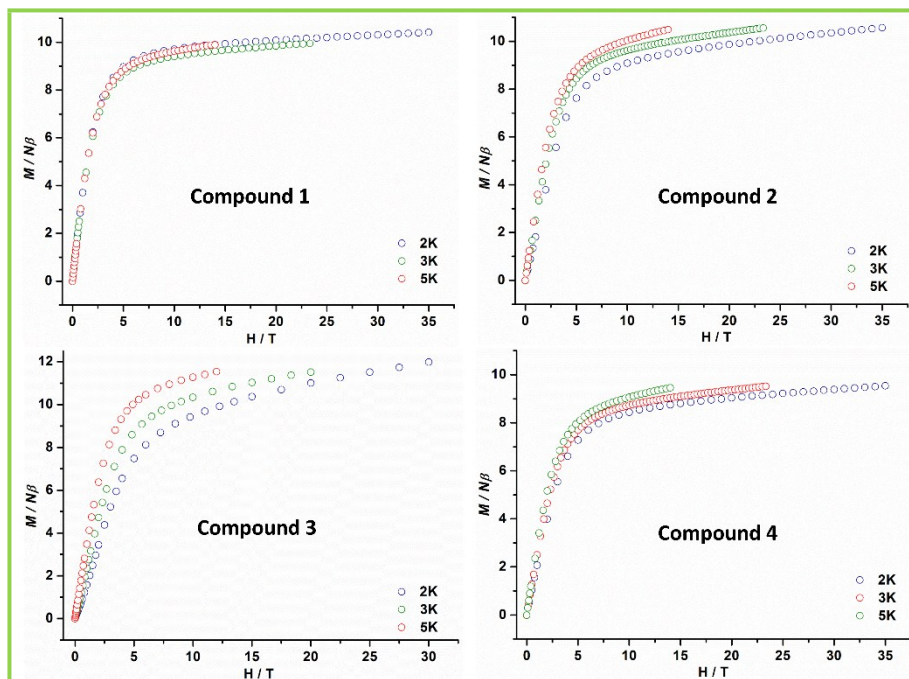

**Fig. S11** Experimental  $M$  versus  $H/T$  plots of compounds **1**, **2**, **3** and **4** measured at 2.0 K, 3.0 K and 5.0 K.

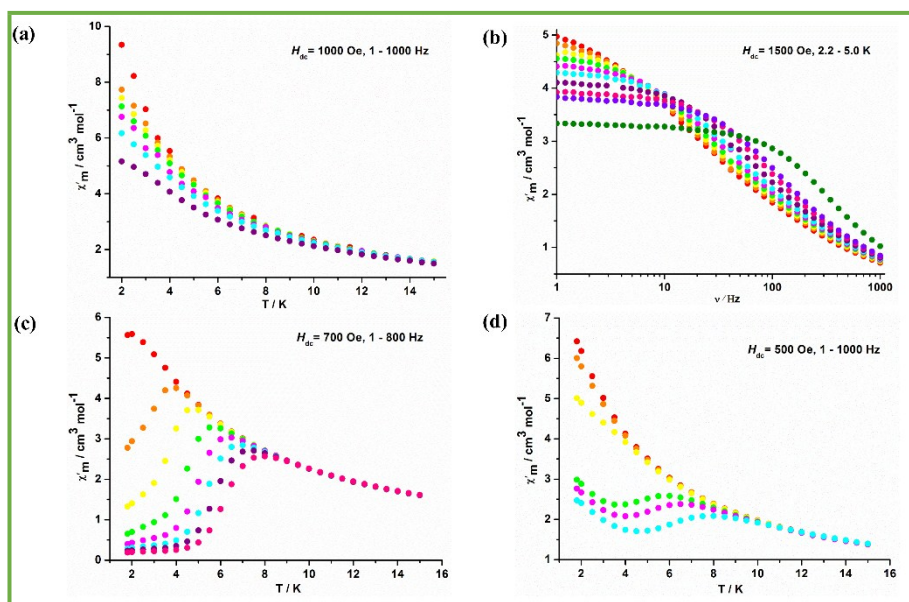

**Fig. S12** Temperature dependence of the in-phase ac susceptibility signals under 1000 Oe dc field for **1**, 1500 Oe dc field for **2**, 700 Oe dc field for **3**, 500 Oe dc field for **4**.

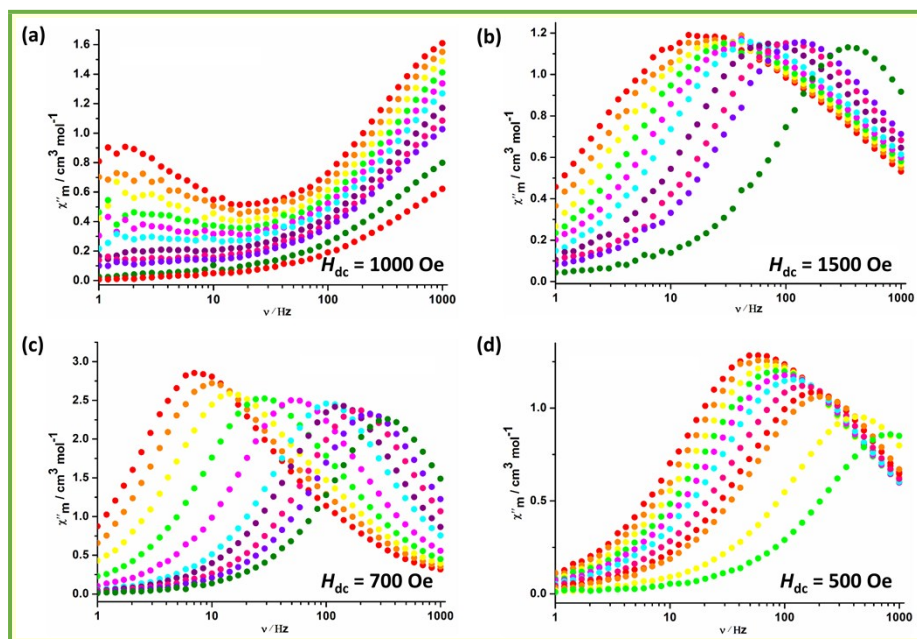

**Fig. S13** Frequency dependence of the out-phase ac susceptibility signals under 1000 Oe dc field for **1**, 1500 Oe dc field for **2**, 700 Oe dc field for **3**, 500 Oe dc field for **4**.

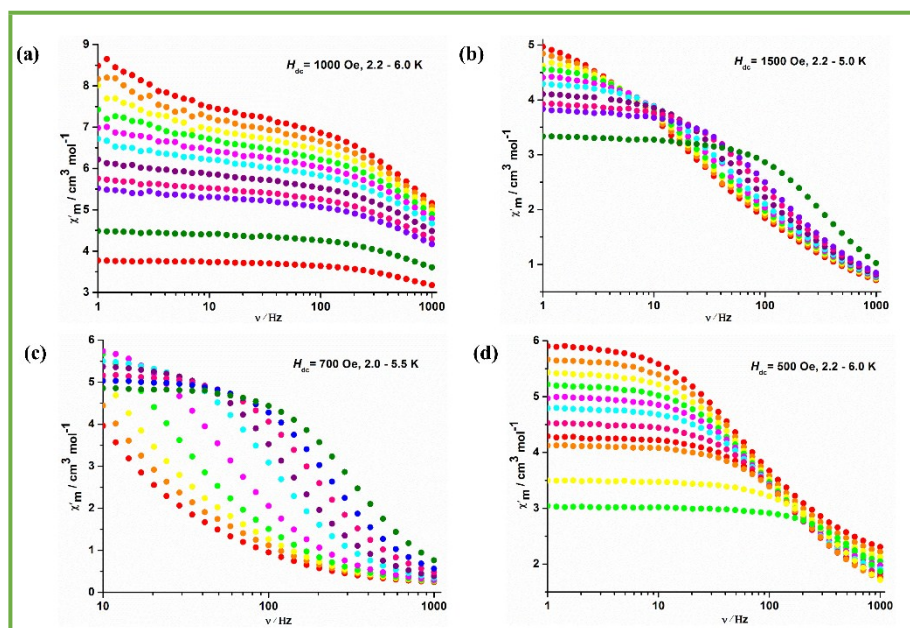

**Fig. S14** Frequency dependence of the in-phase ac susceptibility signals under 1000 Oe dc field for **1**, 1500 Oe dc field for **2**, 700 Oe dc field for **3**, 500 Oe dc field for **4**.

**Table S4** Selected parameters from the fitting results of the Cole-Cole plots for **2** ( $H_{dc} = 1500$  Oe), **3** ( $H_{dc} = 700$  Oe) and **4** ( $H_{dc} = 500$  Oe).

**2**,  $H_{dc} = 1500$  Oe



| $T$ (K)                                | $\tau$    | $a$      | residual |
|----------------------------------------|-----------|----------|----------|
| 2.2                                    | 6.23E-03  | 0.478    | 1.03E-01 |
| 2.4                                    | 5.10E-03  | 0.460    | 1.34E-01 |
| 2.6                                    | 4.13 E-03 | 0.433    | 1.78E-01 |
| 2.8                                    | 3.4E-03   | 0.407    | 1.88E-01 |
| 3.0                                    | 2.73E-03  | 0.374    | 1.75E-01 |
| 3.2                                    | 2.26E-03  | 0.344    | 1.68E-01 |
| 3.5                                    | 1.68E-03  | 0.303    | 1.41E-01 |
| 3.8                                    | 1.25E-03  | 0.263    | 8.80E-02 |
| 4.0                                    | 1.03E-03  | 0.244    | 6.20E-02 |
| 5.0                                    | 4.15E-04  | 0.180    | 1.66E-02 |
| <b>3, <math>H_{dc} = 700</math> Oe</b> |           |          |          |
| $T$ (K)                                | $\tau$    | $a$      | residual |
| 2.0                                    | 1.69E-02  | 0.230    | 1.01     |
| 2.5                                    | 1.26E-02  | 0.232    | 1.13     |
| 3.0                                    | 8.21E-03  | 0.205    | 9.37E-01 |
| 3.5                                    | 4.73E-03  | 0.150    | 5.26E-01 |
| 4.0                                    | 2.61E-03  | 9.57E-02 | 2.12E-01 |
| 4.5                                    | 1.44E-03  | 5.82E-02 | 8.03E-02 |
| 4.7                                    | 1.14E-03  | 4.88E-02 | 5.55E-02 |
| 5.0                                    | 8.05E-04  | 3.78E-02 | 3.73E-02 |
| 5.2                                    | 6.43E-04  | 3.24E-02 | 2.55E-02 |
| 5.5                                    | 4.63E-04  | 2.59E-02 | 1.81E-02 |
| <b>4, <math>H_{dc} = 500</math> Oe</b> |           |          |          |
| $T$ (K)                                | $\tau$    | $a$      | residual |
| 2.2                                    | 2.10E-03  | 2.84E-01 | 1.85E-01 |
| 2.4                                    | 1.94E-03  | 2.66E-01 | 1.45E-01 |
| 2.6                                    | 1.76E-03  | 2.52E-01 | 1.10E-01 |
| 2.8                                    | 1.58E-03  | 2.40E-01 | 7.96E-02 |
| 3.0                                    | 1.41E-03  | 2.27E-01 | 6.18E-02 |
| 3.2                                    | 1.24E-03  | 2.14E-01 | 4.55E-02 |
| 3.5                                    | 1.02E-03  | 1.98E-01 | 2.90E-02 |
| 3.8                                    | 8.31E-04  | 1.84E-01 | 1.96E-02 |
| 4.0                                    | 7.23E-04  | 1.75E-01 | 1.41E-02 |
| 5.0                                    | 3.61E-04  | 1.45E-01 | 4.18E-03 |
| 6.0                                    | 1.82E-04  | 1.36E-01 | 3.07E-03 |

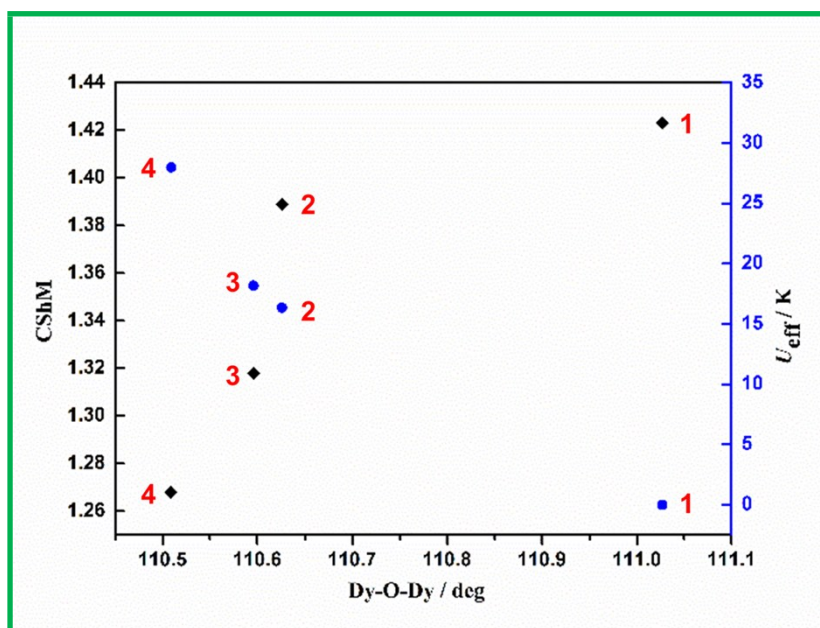

**Fig. S15** Dy-O-Dy(deg) vs. CShM,  $U_{\text{eff}}$  for compounds **1-4**.

## 7. Computational details

Complete-active-space self-consistent field (CASSCF) calculations on individual Dy<sup>III</sup> fragment of the complete structures (see Figure S21 for the complete structure of compound **1**; see Figure S23 for the other three complete fragments) on the basis of single-crystal X-ray determined geometry have been carried out with MOLCAS 8.0 program package.<sup>S1</sup> The dinuclear compounds **1-4** have an inversion center, thus only one magnetic center is calculated. During the calculations, the other Dy<sup>III</sup> ion was replaced by diamagnetic Lu<sup>III</sup>. The basis sets for all atoms are atomic natural orbitals from the MOLCAS ANO-RCC library: ANO-RCC-VTZP for Dy<sup>III</sup> ions; VTZ for close O and N; VDZ for distant atoms. The calculations employed the second order Douglas-Kroll-Hess Hamiltonian, where scalar relativistic contractions were taken into account in the basis set and the spin-orbit couplings were handled separately in the restricted active space state interaction (RASSI-SO) procedure. For the fragment of individual Dy<sup>III</sup> ion, active electrons in 7 active spaces include all f electrons (CAS (9 in 7)) in the CASSCF calculation. To exclude all the doubts, we calculated all the roots in the active space. We have mixed the maximum number of spin-free state which was possible with our hardware (all from 21 sextets, 128 from 224 quadruplets, 130 from 490 doublets for the Dy<sup>III</sup> fragment).

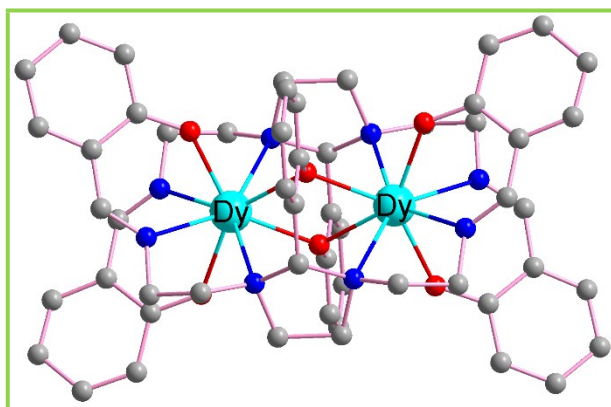

**Fig. S16** Calculated complete structures for compound **1**; H atoms are omitted.

To fit the exchange interaction in four compounds, we took two steps to obtain them. Firstly, we calculated one Dy<sup>III</sup> fragment using CASSCF to obtain the corresponding magnetic properties. And then, the exchange interaction between the magnetic centers is considered within the Lines model,<sup>S2</sup> while the account of the dipole-dipole magnetic coupling is treated exactly. The Lines model is effective and has been successfully used widely in the research field of f-element single-molecule magnets.<sup>S3</sup>

For compounds **1-4**, there is only one type of  $J$ .

The exchange Hamiltonian is:

$$\hat{H}_{exch} = -J_{total} \hat{S}_{Dy1}^y \hat{S}_{Dy1'}^y \quad (S1)$$

The  $J_{total}$  is the parameter of the total magnetic interaction ( $J_{total} = J_{dipolar} + J_{exchange}$ ) between magnetic center ions. The  $\hat{S}_{Dy}^y = \pm 1/2$  are the ground pseudospin on the Dy<sup>III</sup> sites. The dipolar magnetic coupling can be calculated exactly, while the exchange coupling constants were fitted through comparison of the computed and measured magnetic susceptibility and molar magnetization using the POLY\_ANISO program.<sup>S4</sup>

**Table S5** Calculated energy levels (cm<sup>-1</sup>),  $g$  ( $g_x$ ,  $g_y$ ,  $g_z$ ) tensors and  $m_J$  values of the lowest Kramers doublets (KDs) of one Dy<sup>III</sup> center for compounds **1-4**.

| KDs | $m_J$      | 1                  |        | 2                  |        | 3                  |        | 4                  |        |
|-----|------------|--------------------|--------|--------------------|--------|--------------------|--------|--------------------|--------|
|     |            | $E/\text{cm}^{-1}$ | $g$    | $E/\text{cm}^{-1}$ | $g$    | $E/\text{cm}^{-1}$ | $g$    | $E/\text{cm}^{-1}$ | $g$    |
| 1   | $\pm 15/2$ | 0.0                | 0.040  | 0.0                | 0.062  | 0.0                | 0.079  | 0.0                | 0.052  |
|     |            |                    | 0.098  |                    | 0.154  |                    | 0.209  |                    | 0.128  |
|     |            |                    | 18.743 |                    | 18.714 |                    | 18.537 |                    | 18.775 |
| 2   | $\pm 13/2$ | 99.8               | 0.455  | 103.6              | 0.582  | 91.0               | 0.661  | 106.3              | 0.499  |

|   |            |       |                          |       |                          |       |                          |       |                          |
|---|------------|-------|--------------------------|-------|--------------------------|-------|--------------------------|-------|--------------------------|
|   |            |       | 0.691<br>14.805          |       | 0.834<br>14.854          |       | 0.938<br>14.541          |       | 0.704<br>14.986          |
| 3 | $\pm 11/2$ | 195.3 | 1.707<br>1.930<br>11.853 | 210.9 | 2.347<br>2.476<br>11.468 | 188.7 | 2.274<br>2.544<br>11.329 | 217.7 | 2.208<br>2.244<br>11.655 |
| 4 | $\pm 9/2$  | 296.4 | 4.550<br>5.352<br>7.748  | 317.9 | 4.976<br>5.683<br>7.208  | 289.3 | 4.611<br>5.779<br>7.391  | 326.2 | 5.102<br>5.739<br>7.155  |
| 5 | $\pm 3/2$  | 386.4 | 2.277<br>2.862<br>10.608 | 419.2 | 1.492<br>1.910<br>11.123 | 385.1 | 1.546<br>2.158<br>11.211 | 425.6 | 1.699<br>1.967<br>11.013 |
| 6 | $\pm 1/2$  | 495.4 | 0.688<br>1.026<br>14.620 | 540.0 | 0.457<br>0.660<br>14.676 | 500.7 | 0.476<br>0.696<br>14.815 | 543.6 | 0.430<br>0.626<br>14.649 |
| 7 | $\pm 5/2$  | 649.6 | 0.026<br>0.049<br>16.872 | 701.7 | 0.013<br>0.027<br>16.922 | 662.3 | 0.009<br>0.037<br>16.861 | 703.0 | 0.016<br>0.025<br>16.950 |
| 8 | $\pm 7/2$  | 745.0 | 0.017<br>0.030<br>19.226 | 814.0 | 0.012<br>0.018<br>19.319 | 763.5 | 0.016<br>0.029<br>19.200 | 816.2 | 0.009<br>0.013<br>19.359 |

**Table S6** Exchange energies ( $\text{cm}^{-1}$ ) and main values of the  $g_z$  for the lowest two exchange doublets of compounds **1-4**.

|   | 1   |        | 2   |        | 3   |        | 4   |        |
|---|-----|--------|-----|--------|-----|--------|-----|--------|
|   | $E$ | $g_z$  | $E$ | $g_z$  | $E$ | $g_z$  | $E$ | $g_z$  |
| 1 | 0.0 | 0.000  | 0.0 | 0.000  | 0.0 | 0.000  | 0.0 | 0.000  |
| 2 | 0.3 | 37.484 | 1.8 | 37.424 | 1.4 | 37.071 | 1.1 | 37.548 |



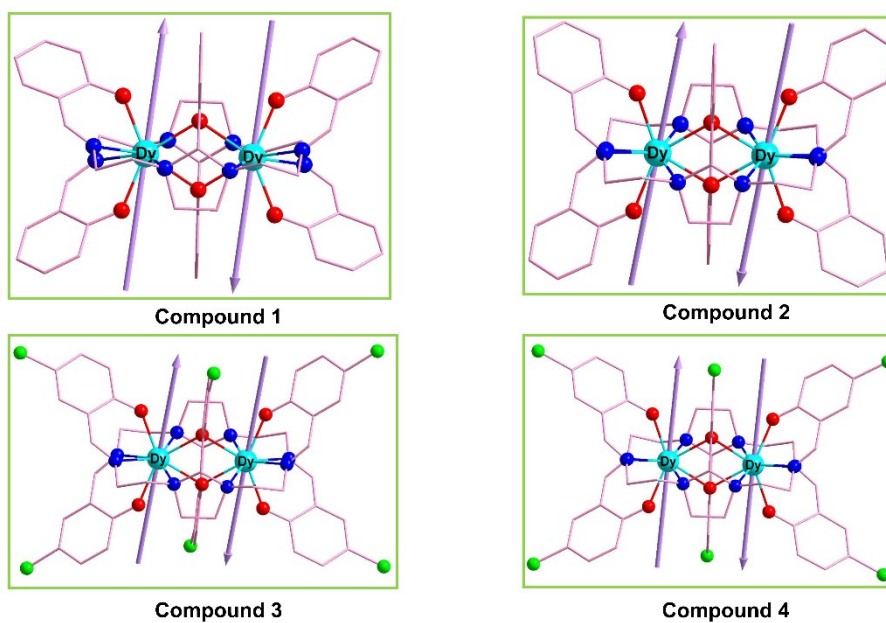

**Fig. S17** Orientations of the local main magnetic axes of the ground doublets on Dy<sup>III</sup> ion of compounds 1-4.

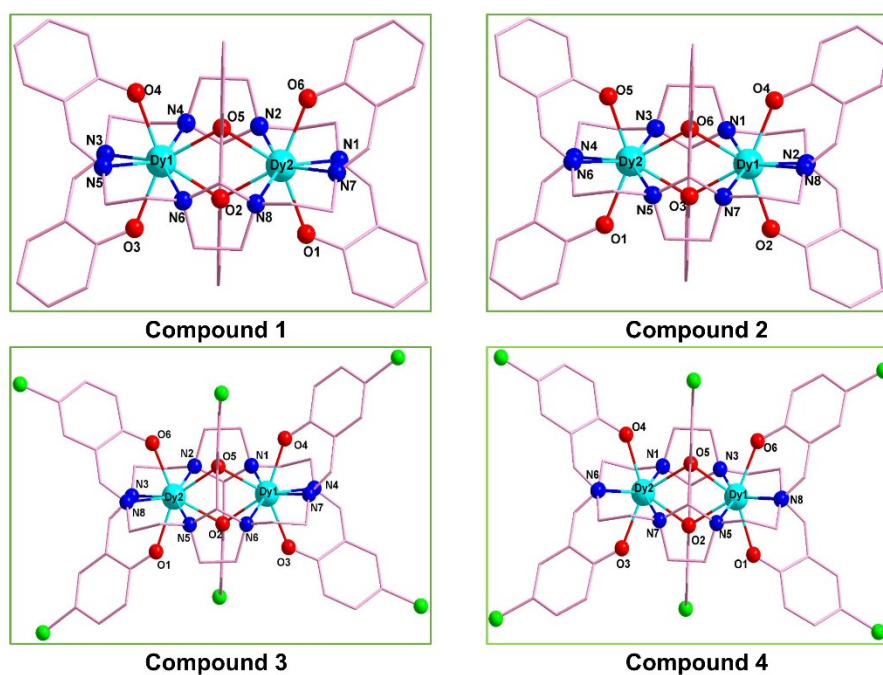

**Fig. S18** Labeled molecular structures of compounds 1-4.

**Table S7** Natural Bond Order (NBO) charges per atom in the ground state of compounds 1-4 calculated within CASSCF.

| Compound | 1      | 2      | 3      | 4      |
|----------|--------|--------|--------|--------|
| Dy1      | 2.476  | 2.476  | 2.477  | 2.479  |
| O1       | -0.813 | -0.826 | -0.808 | -0.815 |
| O1'      | -0.817 | -0.830 | -0.819 | -0.816 |

|    |        |        |        |        |
|----|--------|--------|--------|--------|
| O2 | -0.874 | -0.885 | -0.867 | -0.883 |
| O3 | -0.855 | -0.848 | -0.863 | -0.874 |
| N1 | -0.314 | -0.324 | -0.316 | -0.319 |
| N2 | -0.411 | -0.418 | -0.430 | -0.415 |
| N3 | -0.413 | -0.426 | -0.412 | -0.400 |
| N4 | -0.314 | -0.309 | -0.315 | -0.316 |

## 8. References

- S1 G. Karlström, R. Lindh, P.-Å. Malmqvist, B. O. Roos, U. Ryde, V. Veryazov, P.-O. Widmark, M. Cossi, B. Schimmelpfennig, P. Neogrady and L. Seijo, *Comput. Mater. Sci.*, 2003, **28**, 222-239.
- S2 M. E. Lines, *J. Chem. Phys.*, 1971, **55**, 2977-2984.
- S3 (a) K. C. Mondal, A. Sundt, Y. Lan, G. E. Kostakis, O. Waldmann, L. Ungur, L. F. Chibotaru, C. E. Anson and A. K. Powell, *Angew. Chem., Int. Ed.*, 2012, **51**, 7550-7554; (b) S. K. Langley, D. P. Wielechowski, V. Vieru, N. F. Chilton, B. Moubaraki, B. F. Abrahams, L. F. Chibotaru and K. S. Murray, *Angew. Chem., Int. Ed.*, 2013, **52**, 12014-12019.
- S4 (a) L. F. Chibotaru, L. Ungur and A. Soncini, *Angew. Chem., Int. Ed.*, 2008, **47**, 4126-4129; (b) L. Ungur, W. Van den Heuvel and L. F. Chibotaru, *New J. Chem.*, 2009, **33**, 1224-1230; (c) L. F. Chibotaru, L. Ungur, C. Aronica, H. Elmoll, G. Pilet and D. Luneau, *J. Am. Chem. Soc.*, 2008, **130**, 12445-12455.
